# Supplementary material for: Structures of human CCL18, CCL3, and CCL4 reveal molecular determinants for quaternary structures and sensitivity to insulin degrading enzyme
Source: PubMed Central journal article supplement (PMC4355285; doi:10.1016/j.jmb.2015.01.012), 2015-01-28
Supplement: NIHMS661239-supplement-6.pdf [file NIHMS661239-supplement-6.pdf]

## Supplemental figure legends

**Figure S1 SAXS data of CCL18.** (A) Scattering curve (left) and Guinier plot (right) of CCL18 at pH=7.4 in phosphate buffer saline. The curve-up feature in the plot of  $\ln[I(q)]$  vs  $q^2$  (instead of linear one as in B) shows the formation of severe non-specific aggregation under this buffer condition. (B) Guinier plots of SAXS data of CCL18 in 20 mM citrate buffer, pH=5.5 (left) and in 20 mM bicine buffer, pH=9.0 (right).

**Figure S2 Detailed SAXS analyses that exclude various probable models.** For SAXS data using citrate buffer (pH=5.5), we compared the best fit (model using the mixture of monomer, dimer, and tetramer (M1+D1+T1)) to the experimental data with those fits resulting from use of (A) monomer alone (M1), dimer alone (D1), or tetramer alone (T1) and (B) those using the mixture of monomer (M1), dimer (D1), and three probable tetramer states (T1-T3 from CCL18, T4 from CCL3 and T5 from CCL5) (B). For SAXS data using bicine buffer (pH=9), we compared the best fit (model using the mixture of monomer, dimer, and hexamer (M1+D2+H2)) with those fits resulting from using (C) monomer alone (M1), dimer alone (D2), or hexamer alone (H2) and with those from using (D) the mixture of monomer (M1) and dimer (D2) in addition to two different probable tetramers (T1, T2), or four different hexamers (H1-H2 from CCL18, H3 from CCL3, and H4 from CCL5). The structures of different CCL18 states are shown by ribbon representation at the bottom. Models used to fit the SAXS data were generated from structures of CCL18 (4MHE), CCL3 (2X69) and CCL5 (2L9H).

**Figure S3 Comparison of CCL18, CCL5, and CCL3/CCL4 polymers.** Each dimer of CCL3/4, CCL5 and CCL18 is depicted by ribbon representation (top and middle) and surface charge (bottom). PDB codes for CCL3, CCL5, and CCL18 are 2X69, 2L9H, 4MHE, respectively. Electrostatic surfaces are calculated with APBS [51] and depicted in red for negatively charged surface and blue for positively charged ones (-1kT to 1kT).

**Figure S4 MALDI-MS profiles of four peptides, insulin, CCL18, CCL4, and CCL4 P8A in the presence or absence of IDE.** Peptide degradation by IDE was performed at 37°C with a 50:1 chemokine/IDE molar ratio for CCL4 and 200:1 ratio for CCL18 for 5 seconds.

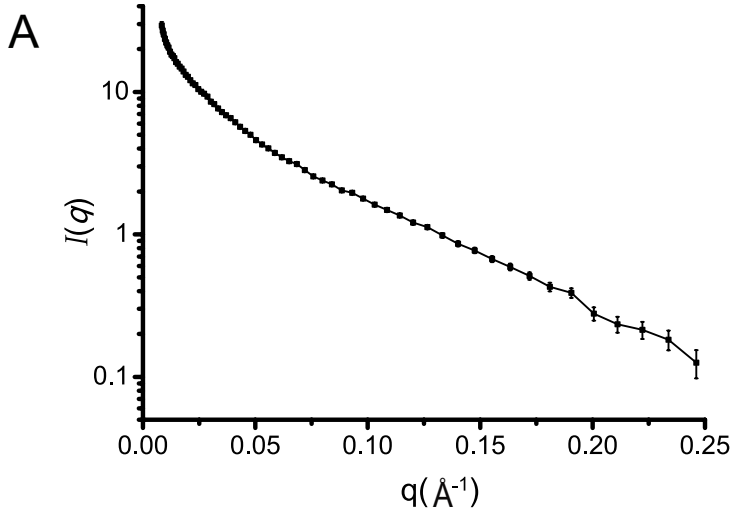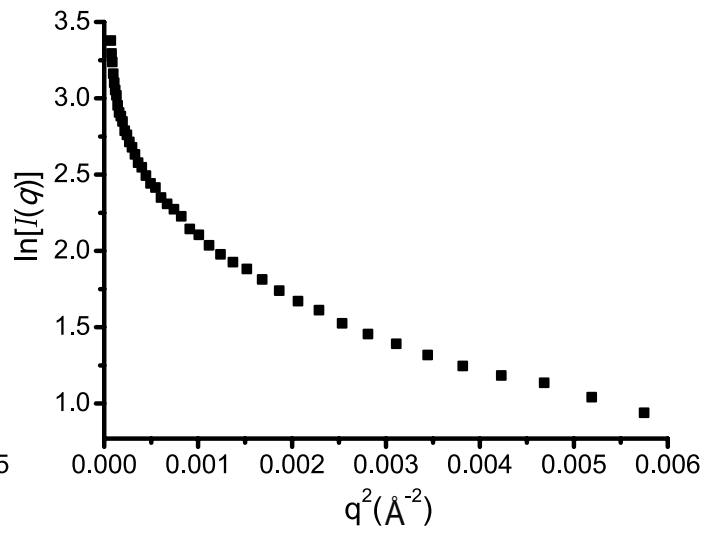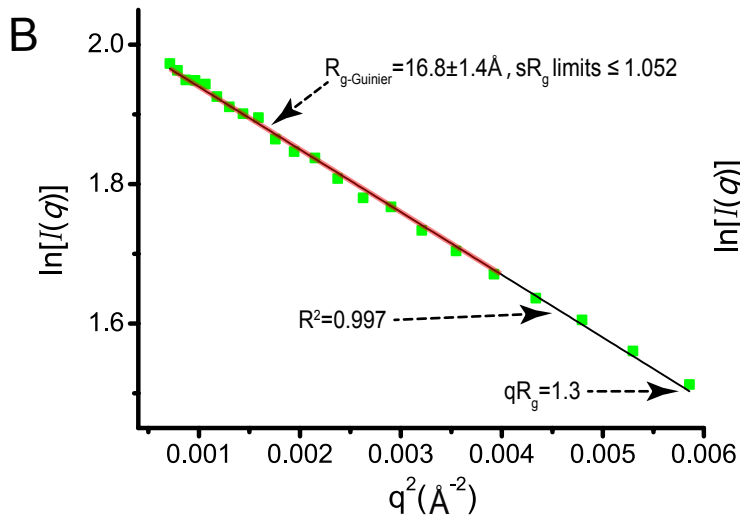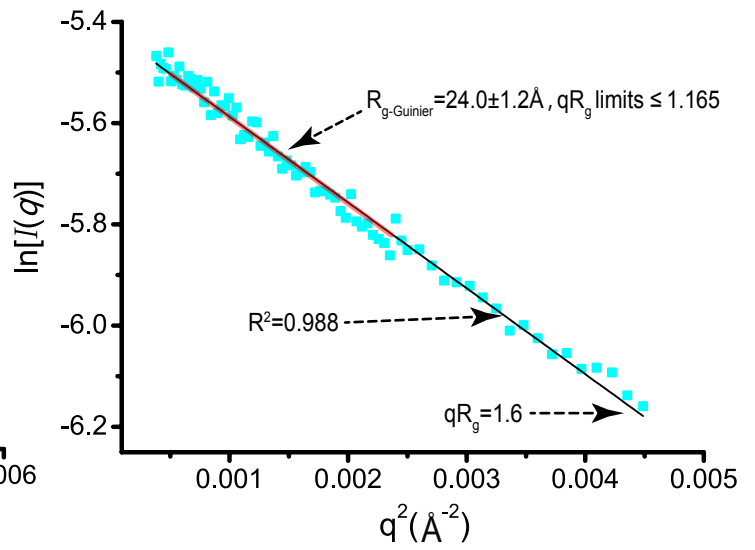

# Figure S2

Citrate, pH=5.5

Bicine, pH=9.0

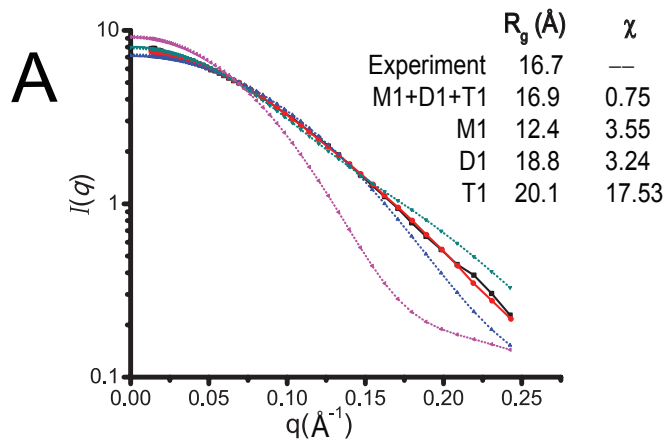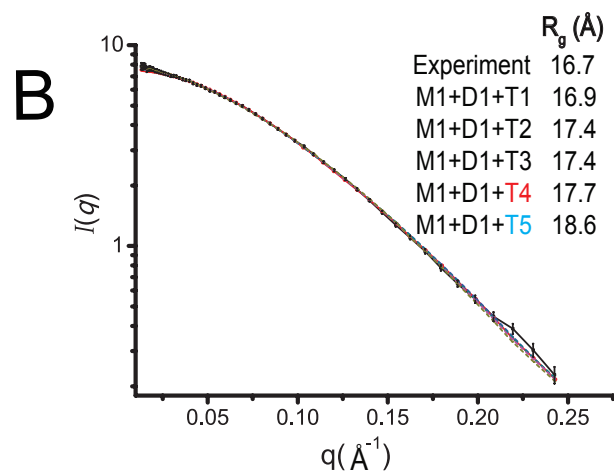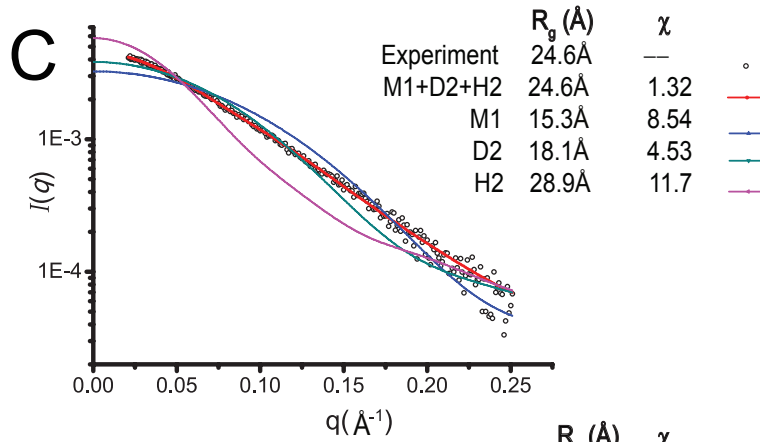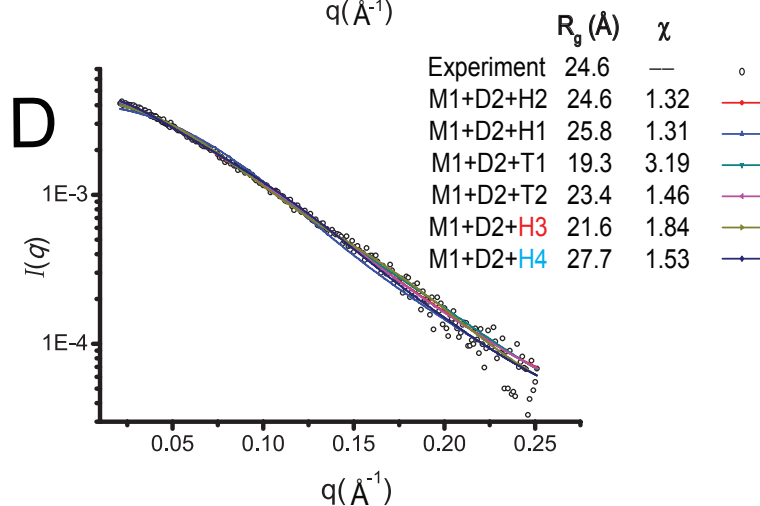

CCL18

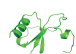

M1=Monomer-1

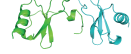

D1=Dimer-1

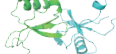

D2=Dimer-2

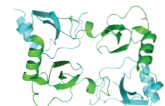

T1=Tetramer-1

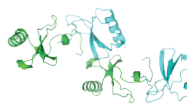

T2=Tetramer-2

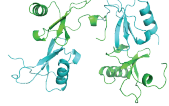

T3=Tetramer-3

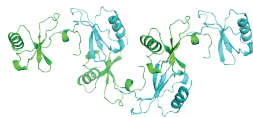

H1=Hexamer-1

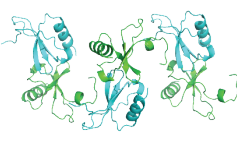

H2=Hexamer-2

CCL3

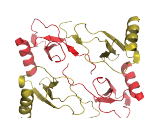

T4=CCL3 Tetramer

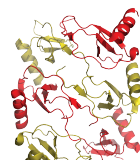

H3=CCL3 Hexamer

CCL5

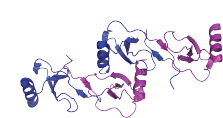

T5=CCL5 Tetramer

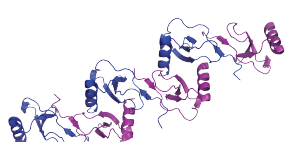

H4=CCL5 Hexamer

# Figure S3

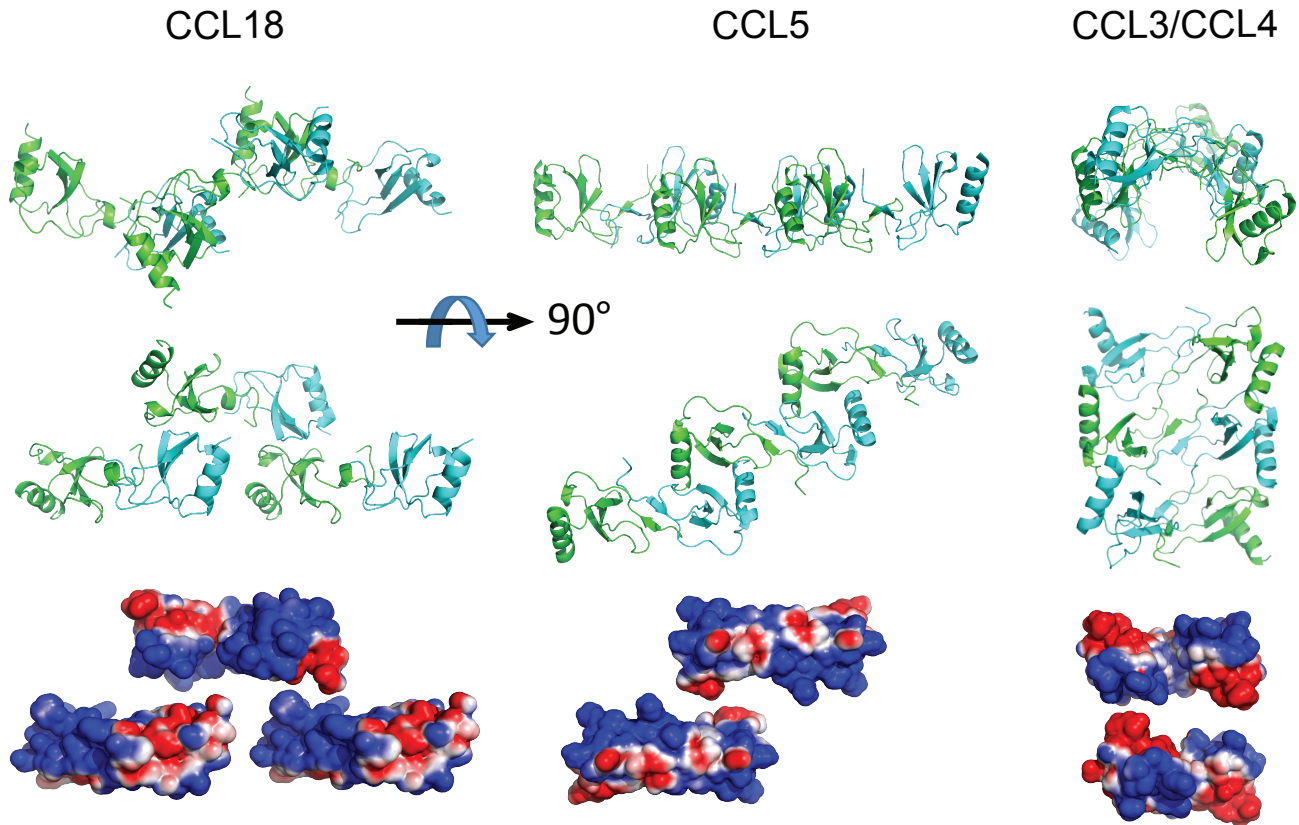

**Figure S4**

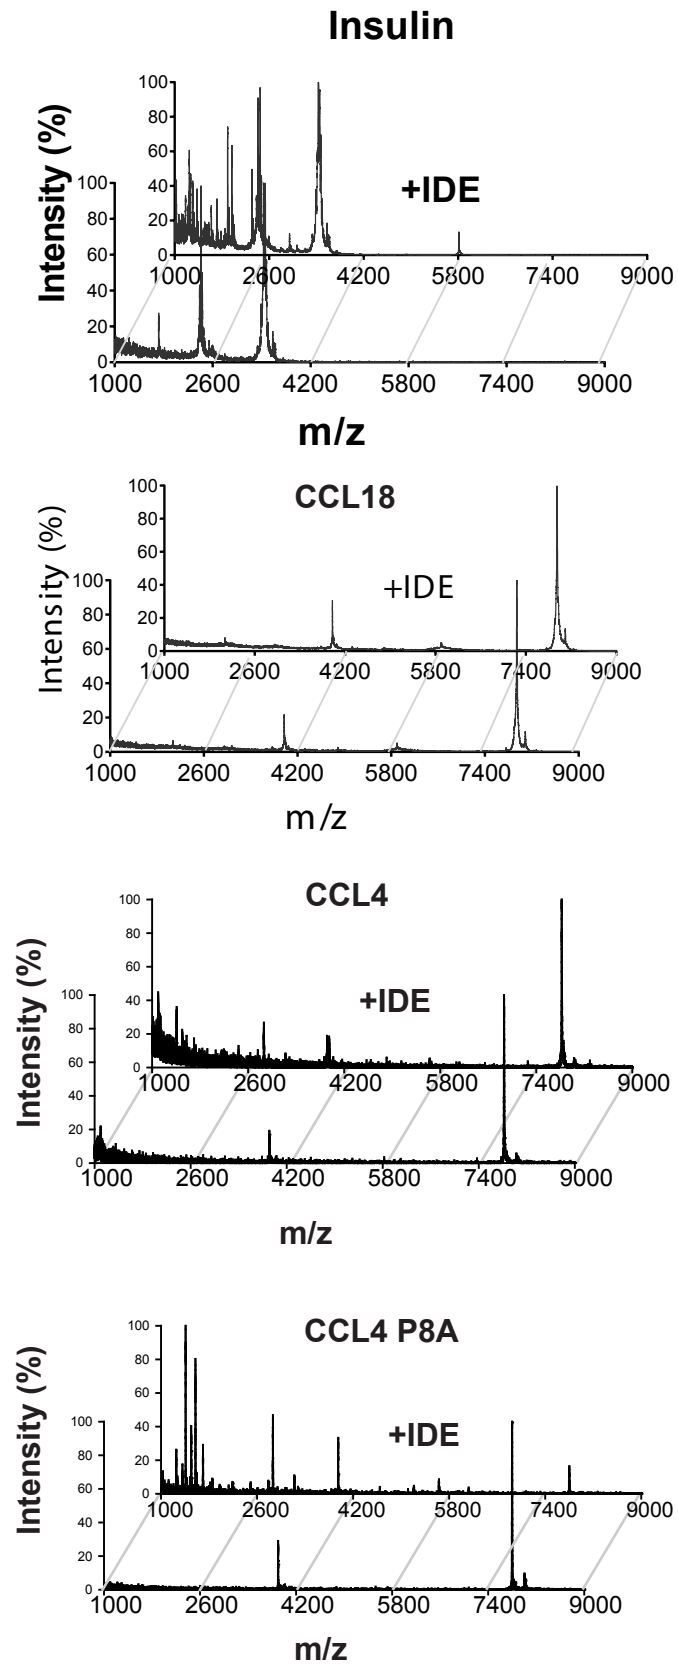

**Table S1 SAXS data collection and scattering-derived parameters**

|                                                                                                                                                                  | <b>CCL18 in<br/>citrate</b> | <b>CCL18 in<br/>PBS</b> | <b>CCL18 in<br/>bicine</b> |
|------------------------------------------------------------------------------------------------------------------------------------------------------------------|-----------------------------|-------------------------|----------------------------|
| <b>Data-collection parameters</b>                                                                                                                                |                             |                         |                            |
| Instrument                                                                                                                                                       | 18ID<br>(BioCAT)            | 18ID<br>(BioCAT)        | 12ID-B<br>(APS)            |
| Wavelength (Å )                                                                                                                                                  | 1.033                       | 1.033                   | 0.886                      |
| q range (Å <sup>-1</sup> )                                                                                                                                       | 0.013-0.243                 | 0.008-0.246             | 0.021-0.251                |
| Exposure time (s)                                                                                                                                                | 1                           | 1                       | 1                          |
| Number of frames<br>collected                                                                                                                                    | 16                          | 20                      | 30                         |
| Concentrations<br>(mg/ml)                                                                                                                                        | 1, 1.5                      | 1                       | 1                          |
| Temperature (°C)                                                                                                                                                 | 24                          | 24                      | 23                         |
| <b>Structural parameters</b>                                                                                                                                     |                             |                         |                            |
| I(0) [from P(r)]                                                                                                                                                 | 7.6 ± 0.1                   |                         | (4.5±0.1)E-03              |
| Rg (Å ) [from P(r)]                                                                                                                                              | 16.7 ± 0.1                  |                         | 24.6±0.1                   |
| I(0) (from Guinier)                                                                                                                                              | 7.7 ±0.1                    |                         | 0.005±0.000                |
| Rg (Å ) (from Guinier)                                                                                                                                           | 16.8 ± 1.4                  |                         | 24.0±1.2                   |
| Dmax <sup>a</sup> (Å)                                                                                                                                            | 58±3                        |                         | 90±7                       |
| <b>Software employed</b>                                                                                                                                         |                             |                         |                            |
| Primary data<br>reduction                                                                                                                                        | Igor Pro                    | Igor Pro                | Matlab &<br>Igor Pro       |
| Data processing                                                                                                                                                  | ATSAS                       | ATSAS                   | ATSAS                      |
| Oligmeric component<br>fitting                                                                                                                                   | OLIGOMER                    |                         | OLIGOMER                   |
| Three-dimensional<br>graphics representations                                                                                                                    | PyMOL                       |                         | PyMOL                      |
| <sup>a</sup> Dmax is a model parameter in the P(r) calculation, the error is an estimate based on the results of P(r) calculations using a range of Dmax values. |                             |                         |                            |

**Table S2:** Summary of mass spectrometry data of IDE-digested CCL4 by FT-ICR.

| Peptide | M <sub>Cal</sub> (M) | M <sub>Obs</sub> (M) | Δppm  | MS/MS (b/y ions)                                                                          |
|---------|----------------------|----------------------|-------|-------------------------------------------------------------------------------------------|
| 1-69    | 7809.630             | 7809.681             | 6.50  |                                                                                           |
| 1-12    | 1149.437             | 1149.434             | 2.61  | b5-6,8-11; b <sup>++</sup> 10-11; y2,6,7; y <sup>++</sup> 10-11                           |
| 1-13    | 1296.505             | 1296.504             | 0.77  | b5-6,9-12; b <sup>++</sup> 11-12; y2-3,6-8                                                |
| 1-14    | 1383.538             | 1383.534             | 2.89  | b5-6,10-13; b <sup>++</sup> 12-13; y2-6,8-9,11; y <sup>++</sup> 11-13                     |
| 1-18    | 1874.787             | 1874.792             | 2.67  | b3-17; y3-16                                                                              |
| 1-19    | 2002.882             | 2002.876             | 3.00  | b3, 6-7,9-10,12,18; b <sup>++</sup> 13,18; y4-6,8-10,13; y <sup>++</sup> 4,6,8,12-18;     |
| 1-21    | 2213.018             | 2213.013             | 2.26  | b3-12; , b <sup>++</sup> 11-14,16,18-20; y3,5-8,14; y <sup>++</sup> 7-20                  |
| 1-22    | 2369.120             | 2369.123             | 1.27  | b3-7,9-12; b <sup>++</sup> 8-12,14,16; y2,4,6-7; y <sup>++</sup> 7-16                     |
| 1-35    | 3889.769             | 3889.818             | 12.6  | b6,10,12; b <sup>++</sup> 18,20,23; y8-10; y <sup>++</sup> 15-16,18-21                    |
| 13-21   | 1082.599             | 1082.596             | 2.77  | b2-8; b <sup>++</sup> 6-8; y2-7; y <sup>++</sup> 6-8                                      |
| 13-24   | 1499.812             | 1499.809             | 2.00  | b2-8; b <sup>++</sup> 6-11; y3-5; y <sup>++</sup> 4-11                                    |
| 13-27   | 1812.976             | 1812.974             | 1.10  | b2,3,5-7; b <sup>++</sup> 3,6-9,11-14; y2,4-8,14; y <sup>++</sup> 7-14                    |
| 13-35   | 2759.350             | 2759.352             | 0.72  | b6,10,12; b <sup>++</sup> 18,20,23; y8-10; y <sup>++</sup> 15-16,18-21                    |
| 17-27   | 1314.764             | 1314.775             | 8.37  | b2; b <sup>++</sup> 6-10; y1-2,4-5                                                        |
| 18-28   | 1406.790             | 1406.786             | 2.84  | b2-4,6-7; b <sup>++</sup> 4-10; y1-5,7-8; y <sup>++</sup> 3-4,6-9                         |
| 19-27   | 1087.626             | 1087.623             | 2.76  | b2-8; b <sup>++</sup> 6-8; y2-8; y <sup>++</sup> 7-8                                      |
| 19-35   | 2034.000             | 2034.002             | 0.98  | b5-12; b <sup>++</sup> 12-16; y6-8,15-16; y <sup>++</sup> 11-12,14-16                     |
| 19-45   | 3119.587             | 3119.619             | 10.26 | b7-12; b <sup>++</sup> 9-26; y3-6,8-15,17; y <sup>++</sup> 15-18,25                       |
| 19-46   | 3275.688             | 3275.697             | 2.75  | b4-11; b <sup>++</sup> 8-24; y4-13; y <sup>++</sup> 9-21,25                               |
| 19-48   | 3490.815             | 3490.817             | 0.57  | b4,6,7; b <sup>++</sup> 8-17; y5,18; y <sup>++</sup> 10-18                                |
| 22-28   | 912.457              | 912.455              | 2.19  | b2-6; b <sup>++</sup> 2,4-6; y1-5; y <sup>++</sup> 6                                      |
| 22-33   | 1479.676             | 1479.675             | 0.68  | b4-10; b <sup>++</sup> 2,4-6; y1-5; y <sup>++</sup> 6                                     |
| 22-34   | 1592.759             | 1592.759             | 0.38  | b3-12; b <sup>++</sup> 8-12; y3-11; y <sup>++</sup> 8,10,12                               |
| 22-35   | 1695.768             | 1695.776             | 4.72  | b2-12; b <sup>++</sup> 9-13; y3-12; y <sup>++</sup> 11-13                                 |
| 22-46   | 2937.456             | 2937.458             | 0.68  | b4-8,16-17; b <sup>++</sup> 7-16,18; y4-9; y <sup>++</sup> 6,9-12,14-19,24                |
| 23-45   | 2625.254             | 2625.265             | 4.19  | b6-7,9-15,17-18; b <sup>++</sup> 13,15,21; y4-6,8-11,13-17; y <sup>++</sup> 18,20         |
| 23-46   | 2781.355             | 2781.368             | 4.67  | b2-13,15,18; b <sup>++</sup> 6-8,15-16,18-19; y5-11,14; y <sup>++</sup> 6-7,9-22          |
| 23-48   | 2996.482             | 2996.490             | 2.67  | b3-9,12-13,18; b <sup>++</sup> 6,9,14,16-17,19,25; y6-11,14,18; y <sup>++</sup> 8-9,11-24 |
| 28-42   | 1693.778             | 1693.780             | 1.18  | b4,7-8,10,12-14; b <sup>++</sup> 13-14; y2,5-7,8-9,11; y <sup>++</sup> 14                 |
| 28-45   | 2050.979             | 2050.979             | 0.15  | b5-10,12-17; b <sup>++</sup> 11,16-17; y3-15,17; y <sup>++</sup> 6,8,11,15-17             |
| 29-42   | 1530.714             | 1530.716             | 1.31  | b4-9,11-13; b <sup>++</sup> 8,12-13; y2,4-9,11; y <sup>++</sup> 5,9,13                    |
| 29-45   | 1887.916             | 1887.921             | 2.65  | b3,5-16; b <sup>++</sup> 6,11,14,16; y3-16; y <sup>++</sup> 7,9,11,14,15                  |
| 36-42   | 747.403              | 747.400              | 4.01  | b3-6; y3-5                                                                                |
| 36-45   | 1104.605             | 1104.601             | 3.62  | b2-9; b <sup>++</sup> 7-8; y2-8; y <sup>++</sup> 8-9                                      |
| 36-46   | 1260.706             | 1260.703             | 2.38  | b2,4-10; y4-9; y <sup>++</sup> 6-10                                                       |
| 36-48   | 1475.833             | 1475.831             | 1.36  | b6,7,11; b <sup>++</sup> 11-12; y4-8,11; y <sup>++</sup> 9-11                             |
| 36-57   | 2392.193             | 2392.189             | 1.67  | b3,6,11,17,18; b <sup>++</sup> 8,13-21; y3-5,7-10,17-18; y <sup>++</sup> 12-21            |
| 36-69   | 3943.917             | 3943.938             | 5.32  | b7,9,11; b <sup>++</sup> 13,15-17,19-24; y5-13,16; y <sup>++</sup> 11-12,14-15,16-19,21   |
| 43-61   | 2206.055             | 2206.048             | 3.17  | b8; b <sup>++</sup> 4,9,11-18; y2-5,7-8,13,16-17; y <sup>++</sup> 12,14,16,18             |
| 43-69   | 3215.531             | 3215.535             | 1.24  | b4,6,8,17; b <sup>++</sup> 8-9,11-18; y2,4-13,16; y <sup>++</sup> 8-13,15-17              |
| 46-61   | 1848.855             | 1848.846             | 4.87  | b3-14; b <sup>++</sup> 11-15; y3-5,7-14; y <sup>++</sup> 8-10,13,15                       |
| 46-69   | 2858.330             | 2858.345             | 5.25  | b5-8,12,17; b <sup>++</sup> 8,10-23; y3-13,16; y <sup>++</sup> 6,10,13,21,22              |
| 47-67   | 1692.753             | 1692.748             | 2.95  | b3-4,6-13; b <sup>++</sup> 13,14; y2-4,8-9,11; y <sup>++</sup> 11                         |
| 47-69   | 2702.229             | 2702.260             | 11.47 | b4-7,9-17; b <sup>++</sup> 17-22; y4-16; y <sup>++</sup> 10,14,17,20                      |
| 49-61   | 1477.626             | 1477.623             | 2.03  | b4-12; b <sup>++</sup> 5,10-12; y2-6,8-10; y <sup>++</sup> 11-12                          |
| 58-69   | 1570.742             | 1570.750             | 5.09  | b2,4-11; b <sup>++</sup> 10-11; y2-10; y <sup>++</sup> 6,10-11                            |
